# Supplementary material for: Physician Perceptions of Surveillance: Wearables, Apps, and Bots for COVID-19
Source: bioRxiv or medRxiv preprint supplement (doi:10.1101/2021.04.26.21256102), 2021-04-28
Supplement: Supplementary file [file media-2.pdf]

**Supplemental Table 2. Country where the Respondent Physician Practices (N=1004).**

| <b>Country</b> | <b>N</b> | <b>%</b> |
|----------------|----------|----------|
| United States  | 340      | 33.9%    |
| Italy          | 116      | 11.6%    |
| Spain          | 83       | 8.3%     |
| United Kingdom | 53       | 5.3%     |
| Germany        | 47       | 4.7%     |
| Mexico         | 44       | 4.4%     |
| France         | 40       | 4.0%     |
| Russia         | 36       | 3.6%     |
| Canada         | 33       | 3.3%     |
| Brazil         | 30       | 3.0%     |
| Venezuela      | 30       | 3.0%     |
| India          | 27       | 2.7%     |
| China          | 18       | 1.8%     |
| Australia      | 17       | 1.7%     |
| Turkey         | 14       | 1.4%     |
| Japan          | 12       | 1.2%     |
| Portugal       | 9        | 0.9%     |
| South Korea    | 7        | 0.7%     |
| South Africa   | 7        | 0.7%     |
| Poland         | 6        | 0.6%     |
| Belgium        | 5        | 0.5%     |
| Greece         | 5        | 0.5%     |
| Argentina      | 3        | 0.3%     |
| Philippines    | 2        | 0.2%     |
| Switzerland    | 2        | 0.2%     |
| Austria        | 2        | 0.2%     |
| Colombia       | 2        | 0.2%     |
| Sweden         | 2        | 0.2%     |

\*One respondent (0.1%) each from Malaysia, the Netherlands, Honduras, Jordan, New Zealand, Ukraine, Czech Republic, Kazakhstan, United Arab Emirates, Hungary, Saudi Arabia, and Nigeria are not shown in the Table.
