# Supplementary material for: Physician Perceptions of Surveillance: Wearables, Apps, and Bots for COVID-19
Source: bioRxiv or medRxiv preprint supplement (doi:10.1101/2021.04.26.21256102), 2021-04-28
Supplement: Supplementary file [file media-4.pdf]

#### **Supplemental Table 4. Selected Comments About Efficacy Gaps with Surveillance Tools**

- Digital surveillance is NOT ready for prime time. Too much risk for: abuse, false results causing more confusion. Would favor if the PPV and NPV were = 95%
- We do not know enough about the virus, and technologies are not enough reliable.
- Way too early. Data should be accumulated and analyzed in context of controlled trials by reputable scientists.
- I fear the behavior of some people, not the technologies. Need deep cultural change for compliance
- The bad will eventually outweigh the initial good. There MUST be an ending period established before it is employed
- Bad for patient and physician; Useless. IT is not medicine
- It's not the acquisition of the data that concerns me, but more those who collect and analyze .
- None of them can perform better than an accurate history of symptoms, and the persons ability to refrain from locally spreading their germs
- Better leadership and reliance on scientific medicine is far more important than unproven and invasive technologies.
